# Supplementary material
Source: PubMed Central journal article supplement (PMC2711641)
Supplement: NIHMS101413-supplement-01.pdf [file NIHMS101413-supplement-01.pdf]

## Supplemental material

**Supplemental material Figure S1.** Centrally-Injected TNF $\alpha$  at 50 ng induces all the Major Symptoms of Sickness Behavior in Mice. A. Duration of social exploration. B. Duration of immobility. Mice were treated i.c.v. with one microliter of either aCSF or TNF $\alpha$  (three concentrations of 25, 50 or 100 ng/ $\mu$ l) and features of sickness behavior were measured over a 3 min duration at time 0 and 2, 6 and 24 h post-treatment. Twenty-four mice were allocated to four i.c.v. treatment groups per treatment) matched for mean baseline social exploration time and body weight. Duration of exploration and immobility were analyzed by a two-way ANOVA with treatment (aCSF, TNF $\alpha$  25, TNF $\alpha$  50 and TNF $\alpha$  100) as a between-subject factor and time (0, 2, 6 and 24 h) as a within-subject factor.

The baseline for duration of social exploration ranged from  $87 \pm 9$  s to  $93 \pm 4$  s over the four treatments (time 0; Supporting Information Fig. S1A). Duration of social exploration was affected by treatments in a time-dependent manner (dose x time interaction;  $F(9, 60) = 4.1, p < 0.01$ ). Post-hoc comparisons of individual group means revealed that TNF $\alpha$  decreased the duration of social exploration for 25 ng at only 6 h ( $p < 0.05$ ), for 50 ng at both 2 ( $p < 0.05$ ) and at 6 h ( $p < 0.001$ ) and for 100 ng at both 2 ( $p < 0.05$ ) and at 6 h ( $p < 0.05$ ). Social exploration returned to control levels by 24 h for all TNF $\alpha$  groups. At initiation of the experiment, all mice were fully active. Duration of immobility increased in response to TNF $\alpha$  according to time (dose x time interaction;  $F(6, 40) = 3.2, p < 0.01$ ] (Supporting Information Fig. S1B). Post-hoc comparisons of individual group means revealed that TNF $\alpha$  increased immobility for 25 ng at 2 and 6 h ( $p < 0.05$ ) and both 50 ng and 100 ng at 2, 6 and 24 h ( $p < 0.05$ ). Based upon results of this experiment, we selected a dose of 50 ng TNF $\alpha$  for subsequent experiments since this concentration was able to induce the full spectrum of sickness behavior symptoms for the duration of the test. Each value represents the mean  $\pm$  SEM. ( $n=6$ /group; \*  $p < 0.05$  and  $^{\S} p < 0.01$  compared to the aCSF control at each time).

**Supplemental material Table S1.** Body weight change induced by i.c.v. injection of TNF $\alpha$  in mice. Body weight change 6 h after treatment in the experiment described above was analyzed by a one-way ANOVA. As expected, body weight was significantly reduced 6 h following i.c.v. injection of TNF $\alpha$  as compared to the aCSF treatment [F(3, 20) = 19.6, p<0.001] (Supporting Information Table S1). Post-hoc comparisons of individual dose means revealed no difference in body weight loss among the three doses of TNF $\alpha$ .

**Supporting Information Table S1.** Body weight changes in mice in response to increasing doses of TNF $\alpha$ .

| WT | aCSF                  | $\Delta$ Body Wt. (g) |            |              |
|----|-----------------------|-----------------------|------------|--------------|
|    |                       | Mean                  | SEM        | Significance |
|    | aCSF                  | 1.05                  | $\pm$ 0.17 |              |
|    | TNF $\alpha$ (25 ng)  | -0.83                 | $\pm$ 0.13 | #            |
|    | TNF $\alpha$ (50 ng)  | -0.78                 | $\pm$ 0.28 | #            |
|    | TNF $\alpha$ (100 ng) | -0.92                 | $\pm$ 0.24 | #            |

Body weight changes 6 h after i.c.v. treatment. Values represent means  $\pm$  SEM (n=6/group; \* p<0.05, § p<0.01 or # p<0.001 compared to the appropriate aCSF control).

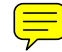

**A WT**

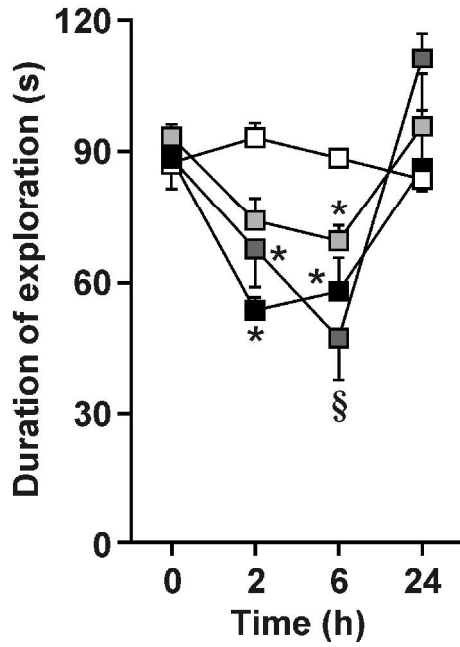

**B WT**

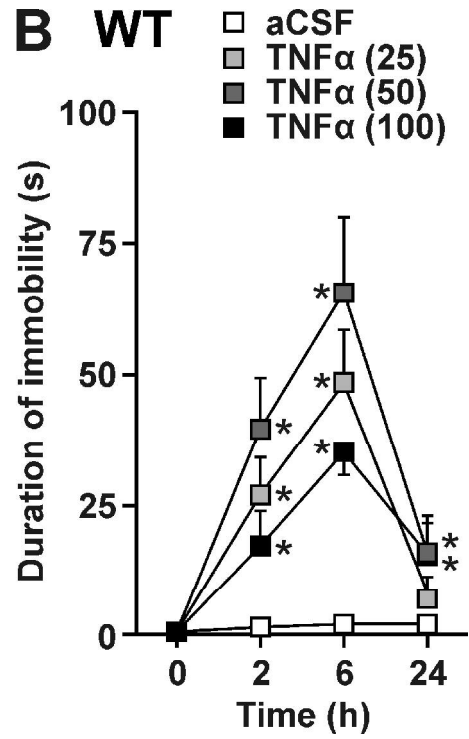

111x80mm (600 x 600 DPI)

1  
2  
3  
4  
5  
6  
7  
8  
9  
10  
11  
12  
13  
14  
15  
16  
17  
18  
19  
20  
21  
22  
23  
24  
25  
26  
27  
28  
29  
30  
31  
32  
33  
34  
35  
36  
37  
38  
39  
40  
41  
42  
43  
44  
45  
46  
47  
48  
49  
50  
51  
52  
53  
54  
55  
56  
57  
58  
59  
60
